# Supplementary material for: Potential T cell epitopes of Mycobacterium tuberculosis that can instigate molecular mimicry against host: implications in autoimmune pathogenesis
Source: BMC Immunol. 2012 Mar 21;13:13. doi: 10.1186/1471-2172-13-13 (PMC3359254; doi:10.1186/1471-2172-13-13)
Supplement: Additional file 2 — List of putative cross reactive epitopes from human proteome restricted to HLA class I alleles. Data sets represent a list of human peptide regions showing sequence similarity with M. tuberculosis. These peptides were assessed for binding to predominant HLA class I and HLA class II alleles. Based on IC50 values, they were classified as strong binders (IC50 ≤ 500), weak binders (500 ≤ IC50 ≤ 5000) and non-binders (IC50 ≥ 5000). Peptides binding to more than three different alleles were considered as promiscuous. [file 1471-2172-13-13-S2.XLSX]

## Sheet: Sheet1
Regions similar to antigenic proteins of Mtb	A*01:01	A*02:01	A*03:01	A*11:01	A*24:02	B*07:02	B*08:01	promiscuity
RLIVHPLRP	25117	16849	8822	23905	37265	36392	28356
RVLEKAALK	24694	34906	18	15	31222	33810	25535
GTRFGAMLD	27787	46670	19975	28231	44754	41803	32559
FILYTSGSTGKPKGV	14854	4499	2434	85	13001	15611	22465	Promiscuous
IGLEKIGVKI	24281	3085	6218	8471	35033	29631	24160
GDRVPADLRL	26776	47416	34053	34952	38623	38168	24652
LSIDESSLTGETTP	17399	20178	39219	32063	33921	30469	28138
VTVTLALGV	14752	1029	31473	19833	27786	34981	26788
KRAIVKKLP	28748	48657	45409	44747	44233	42933	26521
VICSDKTGTLTKNEMTV	1806	614	11436	6952	28681	7479	20759
PFSSEQKWMA	7577	6390	42081	38949	28808	40096	25187
KMKIIKSLQ	27322	32989	6819	22463	34115	39269	23275
VVAMTGDGVNDA	19798	3119	39361	28230	37385	13237	26282
SAIEEGKGIYNNI	3496	24968	22620	13876	27356	22016	18417
ICSDKTGTLTKNEMTV	1806	614	11436	6952	28681	7479	20759
ADIGVAMGQ	28179	46285	41103	35815	44872	43303	27891
GDRIPADIRL	26831	46126	36076	38134	36620	39369	24219
SVLCSDKTGTLT	1806	13362	38654	37335	36529	10099	21882
IPFSSEQKWMA	7577	6390	42081	38949	28808	8969	25187
KLKIIKALQ	28653	26698	7646	25135	40204	39620	21103
IVAMTGDGVNDAV	19798	2795	39086	29238	36737	13529	26282
ADIGIAMGQ	28632	46153	41057	36885	45012	43844	28083
GTDVSKEAANMIL	12969	30685	42560	37232	17090	27601	25442
AVEEGKGIF	21734	48359	41840	35992	31875	6270	25912
IVAMTGDGVNDA	19798	2795	39086	29238	36737	13529	26282
Total 25	SB-0, WB 4	SB-0, WB 8	SB-1, WB 1	SB-2, WB 0	SB-0, WB 0	SB-0, WB 0	SB-0, WB 0	Promiscuous 1
Regions similar to secretory proteins of Mtb	A*01:01	A*02:01	A*03:01	A*11:01	A*24:02	B*07:02	B*08:01
TGPPGTGKT	27837	47647	44980	44784	45154	36936	28108
PSPLPEQPL	29623	48193	45527	43856	34621	39693	26349
EGDKINEGDLL	26386	47280	46413	45733	33127	39035	27587
Total 3	SB-0, WB 0	SB-0, WB 0	SB-0, WB 0	SB-0, WB 0	SB-0, WB 0	SB-0, WB 0	SB-0, WB 0	Promiscuous 0
Regions similar to structural proteins of Mtb	A*01:01	A*02:01	A*03:01	A*11:01	A*24:02	B*07:02	B*08:01
GNICRSPIAE	27490	35815	32011	24591	40715	32789	25763
LVAMYEHKIF	22523	2345	36559	28712	3814	13014	11624
ATWCGPCKMI	25901	7321	35860	28981	8979	16295	27168
VEFFASWCG	29126	39192	45188	41874	42916	44578	28539
GDLLSGLSVA	26540	9876	37646	41581	42533	27856	25042
GDLLAGISV	27939	22967	45174	44122	45070	30935	28606
LVPQAIAYS	25042	10849	36165	33379	41906	35157	29372
GTTIMAVQF	17801	45417	36560	25868	23041	35345	28130
GTTIMAVEF	13326	43640	39392	25838	23782	35618	27656
PPLFPTTASP	28925	27164	34300	39725	44463	3240	26567
IISKQSREQ	26411	40722	22835	32779	36050	34597	26437
QKVSELKEKF	25644	39790	33628	26422	24259	10745	21445
ARRAIWDLI	26310	44901	45972	43996	26852	27917	26654
FLDEPTTGMDPKARR	16317	12	19112	1221	39222	17808	16788
FLDEPTTGMDP	16317	12	32034	42711	44424	23251	16788
LDEPTTGMDPQARR	26881	42003	12973	414	34286	11105	26479
LDEPTSGVDP	26988	49504	46317	45549	44990	41108	30601
SRRSIWDLL	25415	44720	45715	43609	29043	19777	23797
LLGPNGAGKTT	25381	31907	403	3719	39997	1668	26512	Promiscuous
LDEPSTGVDP	27278	49403	46261	45549	45177	40296	30801
LDEPSSGMDPKSKR	27153	47618	5699	83	37365	11906	25795
KIIAVNNIS	25152	14762	24729	18456	38221	37435	25528
VRKGEVLGLLG	24261	25060	41659	43007	30554	23248	19449
LDEPSTGMDP	27249	49276	46048	45421	44844	41215	30932
SGAGKSTLLNILS	19244	27648	11775	17217	32095	13022	23511
STQFMDEAD	24287	44238	45553	26472	43246	41958	31008
VKKGEVIGLLG	23961	17701	42561	43291	31331	34163	23297
FLDEPSTGMDP	17049	36	33476	42817	44137	28036	17526
LDEPTSGMD	28767	49377	46311	45424	46334	42014	31235
SRRAIWDLL	25488	44288	45728	43192	32262	19839	24485
VKKGEVLGLLG	24610	20071	42746	43030	31661	32289	22460
NGAGKSTLLNILS	19244	34172	11775	17217	34899	23430	18562
VKKGEILGLLGPNGAGKSTIINIL	24963	19400	403	3719	32518	562	18404	Promiscuous
NGAGKTTII	27625	37733	43823	45086	37937	23894	18867
HLDEAEALSDR	16886	4286	34496	37489	43610	45347	27998
LDEPSSGMDP	27319	49395	46011	45522	45183	41780	31157
GEILGLLGPNGAGKSS	25381	31907	403	3719	39997	2152	26512	Promiscuous
LDEPSTGIDP	26764	49337	46159	45582	44888	41880	30960
SGAGKSSLLNILN	17233	30003	6938	9730	30869	14479	23044
LDEPTTGLDP	25775	49075	46069	45233	43977	42889	31039
STQFIDEAD	24634	42962	45204	28563	42039	42289	30651
GEILGLLGPSGAGKSS	26620	26127	126	2245	41492	1435	26328	Promiscuous
IMGPSGAGKSTLMNILA	18181	15671	81	666	33838	336	23826	Promiscuous
ELIGIMGPSGAGKST	25125	26267	81	666	33838	336	25043	Promiscuous
GKSSLLDVLA	19914	18527	24518	17755	37470	34192	25660
LVGPNGSGKSTV	25783	46563	636	479	37469	236	26709	Promiscuous
LDEPTSGLD	28067	49232	46171	45241	45423	43143	31130
SGSGKTTLLD	23379	27713	31494	31757	37048	9861	24507
LVGPSGAGKST	25773	43248	387	339	39596	336	27314	Promiscuous
NGSGKSTVV	27575	36330	44222	44963	44497	27671	16516
ITSLLGPNGAGKTT	25381	31907	403	3719	39997	1668	26512	Promiscuous
ITSLLGPNGAGKTTTI	25381	32264	403	3719	33429	1668	18922	Promiscuous
NGAGKSTLL	26171	34409	41972	44116	34899	23430	18562
IPSGSVTALVGPSGSGKSTVL	20226	22156	195	273	27681	7	4734	Promiscuous
PDILLLDEP	28532	49036	46576	45441	45893	44881	29689
SGAGKSSLL	25083	30401	39507	39188	30869	14479	23044
DPQILLLDEP	27531	46196	46054	42643	41414	28651	28802
LLGPNGAGKSS	25381	31907	403	3719	39997	2152	26512	Promiscuous
SGTGKSTLM	26614	40030	41077	40656	42155	18626	26157
LLGPNGAGKSTII	25381	31907	403	3719	36097	562	18404	Promiscuous
LLGPSGAGKSS	25190	28868	126	2245	41492	1435	26840	Promiscuous
SGAGKTTLL	24581	22894	38161	40027	34815	7751	23471
SGAGKSTLL	24763	27648	38899	40038	32095	13022	23511
TGAGKSSLI	25910	35721	39689	40551	20935	29905	25230
SGSGKSTIVR	25588	29591	1346	989	39468	24455	26016
ALVGPSGAGKSTILR	25420	34680	387	339	34463	336	20011	Promiscuous
VTALVGPSGSGKSS	25035	36807	195	273	38906	702	27531	Promiscuous
VTALVGPNGSGKSTV	25362	36670	636	479	37469	236	26709	Promiscuous
SVRNNIAYGLQ	26397	33425	32838	32388	35817	12096	24307
SLQENIAYGL	23302	4433	37492	32961	26322	37510	25176
NPKILILDE	30914	49295	45300	43115	44345	24958	25736
NGSGKSTVVQ	26813	36330	23308	26998	41418	27671	16516
IVIDGSGAL	25333	6008	31422	23417	26293	263	18298
Total 73	SB-0, WB 0	SB-3, WB 3	SB-15, WB 3	SB-8, WB 13	SB-0, WB 1	SB-8, WB 11	SB-0, WB 1	Promiscuous 17
Regions similar to metabolic proteins of Mtb	A*01:01	A*02:01	A*03:01	A*11:01	A*24:02	B*07:02	B*08:01
LNLILTTGGTG	24693	16123	40348	40577	41461	28072	24854
TLIINLPGS	27503	3673	33454	29662	39905	42463	29768
GKTLIINLPGS	24448	3673	22812	15102	39730	37741	29104
VNLGQGFPD	28546	44966	44739	42308	43685	42647	30369
KTKAIILNTPHNP	21553	21553	9344	5143	33194	30186	26738
LSAIPVSAFCN	12443	20540	30551	13775	10500	19333	17043
EVIIIEPFFD	27951	27641	38268	16596	1987	38830	26448
RTKALVLNTPNNP	21617	28980	10777	10240	35246	35826	26323
NPRLIYARLSGFGQ	25525	15197	10325	16514	1792	56	824	Promiscuous
AGHDINYLA	26218	11145	40238	35563	41830	41221	25724
LGIIMALFDR	26970	35964	5460	95	37799	41437	29674
MLDGGAPFY	165	10240	219	2022	44032	42425	29039	Promiscuous
TADGEFMAVGAIE	11054	3814	40625	24475	20267	24911	24345
GTDACVTPV	3256	87	34994	18341	41009	34723	27722
DLGAEVIKV	24231	4006	41683	42965	40628	43413	28247
IMYALGVGA	25797	75	3458	13590	41788	35483	20239
LYRLSGDRNPLH	17621	2881	11420	15124	26891	906	13249
KPILHGLCTF	28417	43622	38131	38626	17344	434	19224
KPVYPGQTL	29787	44336	44288	44017	33999	11	14934
YIMLSGRLR	23953	38194	2151	798	30937	32616	26939
YIVLNGRLR	25044	45444	12216	8225	34741	34891	26442
PDILIRTSGE	29193	47167	42944	40026	41993	41020	27695
FLLWQTSHS	23493	307	15888	37079	38099	37585	22170
YPTLQPFQYLEEV	22931	7267	25922	5674	25998	7162	21488
WATENGFSYPVIS	2972	10929	31974	11793	20141	18532	26232
LPASPYGGP	27901	48631	44349	43350	45331	14849	28308
LVVFGASGFTGQ	26731	12852	21192	11626	22272	12731	24587
GFDSIPADL	27389	23082	44456	43767	15844	39546	26373
SNGLVPMLRV	26107	20700	12881	3038	34223	38646	25414
SNLCTEIVE	29893	46109	44591	40560	42334	43708	29769
LVVTNAAGGL	24098	22579	38038	33395	35065	3466	27388
DGVIVSTPTGSTAYA	155	23995	5220	1140	33792	203	25784	Promiscuous
TNGSQFFITV	23871	8710	41432	40389	40091	31069	19887
TNGSQFFIT	26788	40802	41432	40389	40091	44615	26651
KYTVFGKVID	25649	40693	44086	39867	277	31266	17593
ILAMANAGP	25407	15089	30674	37917	43289	39516	30036
TNGSQFFVTL	25695	21605	41611	40449	36155	22556	11950
TNGSQFFITL	25189	19393	41432	40389	35800	22365	13806
ILSMANSGP	25224	24401	33137	37536	43801	38873	31342
YLDKKHTIFG	1002	47161	36074	43181	12569	21763	558
LLSMANSGP	24107	21781	37220	39542	45176	39389	31502
ILSMANAGP	25454	18819	33324	38369	44068	39374	31017
VLSMANAGP	24752	19941	36455	37766	44709	39465	31186
TNGSQFFLT	25590	35212	39349	36746	33617	45038	27154
SNGSQFYITL	25534	21749	43790	40920	34537	23320	12800
NYAASKAGVIGL	17003	20723	34978	26009	8084	1569	3544
VVAFLASEDS	24998	40149	33670	21985	41070	36475	28919
SRALAKEVAR	27367	45075	6850	817	39663	30542	22600
SEDASYITG	24098	40319	45729	43214	44530	43478	29401
IDVVVNNAGI	26836	34932	45424	43649	28154	32968	25319
GPVDLLVNNA	22999	39944	44478	39090	41383	22042	27372
ASWINGAVI	27341	15687	40687	38220	21664	12901	26215
YLASDESAYVTG	9096	251	8868	13857	38589	15866	18484
LDILVNNAGVN	26241	9715	27917	39037	39999	36788	24497
VDVLVNNAGM	26811	35361	44385	41369	36643	34292	22286
ASYVTGAVL	25736	17422	30841	22885	26369	4911	14714
KAVLVTGGD	27299	45815	41252	36972	44702	34494	28780
LDVLINNAGI	27044	27069	44977	42616	22821	35938	26254
VDILINNAGV	26474	11160	44807	42981	40280	39516	25499
FILYTSGSTGKPKGV	14854	4499	2434	85	13001	15611	22465	Promiscuous
FPYARQDKK	26847	46314	5325	5397	41548	11684	19837
SFGYQITSFFA	26740	21879	29120	25534	191	20156	9510
SSRYGTPEE	29163	43626	36866	31085	42821	33160	32001
SFGYQITSF	29511	42886	38833	40604	191	26992	25255
STFRVLPWA	24890	910	8814	1553	32291	41791	27122
WLAGLLKHS	26073	13812	39919	42026	42473	40783	26937
TSTPLGDAAE	24217	40338	42223	30117	40719	34591	27749
YWNKPEETK	25850	47573	32928	16022	13788	42153	27339
IFSLEMSKTE	26386	40566	41677	39921	24110	39483	25832
ELKIDGLAVAL	20714	720	30654	28311	37766	8293	2996
PFANPRNAAAGSLRQ	21220	3009	5766	9129	33306	1675	1113	Promiscuous
IDGVVVKVN	29858	48954	45957	45273	44950	44669	26475
AIAYKFPPEEA	27076	26173	22065	5981	20487	25582	28340
KAGDIIPEV	23173	35	37813	29815	35660	28243	26150
GNVSKKTNYLV	17181	6439	34479	29267	15462	1614	6829
VIGSGPGGYVAAIKAAQLG	15512	14288	6674	7392	27627	236	7702
CLNVGCIPSKALL	26274	8770	9621	8922	32332	17082	17517
YVAAIKAAQLG	21399	14288	23748	13891	27627	2989	7702
VLGAGPGGY	13979	41538	2991	10312	44210	41862	28258
DVVIVGAGP	27942	47780	44959	42771	43977	42422	29909
IIEPTSGNTGI	25627	39800	40579	39809	40302	1164	23806
TIIEPTSGNTGI	25627	38468	29603	17809	40302	1164	23806
VLPESTSLQ	24502	4287	11798	25137	33289	38281	30020
LPLGLIPAGS	28389	35268	42018	43763	44052	14046	25402
GDAYMVVSGLP	26550	21743	41250	28420	1226	20800	19850
VVAGVIGAKK	23056	40282	96	16	28764	28451	24440
VDIANKLES	26800	46459	45056	42796	44836	42964	28868
SGPVVAGVVG	25484	37220	45077	43667	39252	1845	25441
VLAGVIGARK	24163	28614	379	779	37209	35122	25605
VNVASRMEST	23004	14003	37952	33441	41145	7828	16166
SILFADIVGFTQ	11011	1687	13221	22957	14202	36762	23474
GPVVAGVIGA	27734	22749	39776	34350	44420	3075	28078
VNVASRMDST	23069	20427	39211	33191	40642	10456	24431
SILFADIVGFT	26636	1687	13221	22957	14202	36762	23474
GPVVAGVIGARK	24464	22749	1163	170	34080	3075	26242	Promiscuous
GPVIAGVIGAQK	24457	16337	1036	469	33365	3122	24857	Promiscuous
GPVIAGVIGARK	24944	16337	1097	389	32266	3122	25763	Promiscuous
SILFADIVGFTK	8553	1687	3578	356	14202	36762	23474	Promiscuous
GPVVAGVIGAQK	24250	22749	1853	385	35030	3075	25542	Promiscuous
NVASRMEST	23004	14003	37952	33441	41145	7828	16166
SILYADIVGFT	26190	2011	8527	20840	1692	35170	18396
TMLFSDIVGFT	24096	720	9986	20762	18720	37595	22312
DGKELSDED	29704	49664	46593	45700	46527	45596	32445
DGKKLSDED	28994	49744	46564	45754	46016	45486	31841
PPIMIMMRMAR	26078	30382	209	39	33365	2859	19192	Promiscuous
YVPFGAGRHRCIG	21557	34882	19060	22024	29572	18002	2334
VLKESLRLYPP	19139	39237	773	11394	40467	38243	23710
MKESLRLHPPV	24110	22825	40978	32993	24769	37265	20744
VIKETLRLNPPV	24483	6937	34896	34896	28669	37487	23658
SRFSFIPFG	26829	21935	44458	35306	44131	44740	27537
IKESLRLHPPV	26082	22825	40978	32993	24769	37265	20744
VKESLRLHPP	25539	44114	41706	40461	44356	37265	26227
FTYLPFGAG	25231	37460	29334	25097	44019	33238	21082
LKESLRLHPPI	25861	36217	41706	35225	5625	36674	19815
VLKETLRLYP	20149	39644	1806	12754	39383	39636	22284
LDSVVEETLRL	21667	286	29960	16724	29561	1111	18367
LDSIIKESLRL	21698	1010	26522	11804	19468	12867	16476
IGAKLVQDVA	25797	24260	43348	40443	35808	33117	19469
IGNIISDAM	29241	42070	44973	43747	40710	20216	21048
EGMKFDRGYIS	27361	21841	36055	37820	35735	27811	23647
VAVKAPGFGD	26567	45319	31371	17591	41378	29797	28931
KPLVIIAEDVDGEALSTLVLNRLK	18152	12279	296	10	19382	9702	22665
EGMKFNRGYIS	25912	26105	32234	36135	31110	19579	20066
KPLVIIAEDVDGEALSTLV	18152	12279	40497	34643	39950	20138	22665
EGIKFDRGYIS	28836	36391	38736	36287	39846	20992	23886
LKFDRGYVS	29675	34408	44107	41963	44829	39306	24594
GEALSTLVLN	26130	35279	39479	31284	32752	9702	23102
KPLVIIAEDVDGEALSTLVLN	18152	12279	39479	31284	32752	9702	22665
LALVTGGEI	23220	19700	44188	40053	20028	16259	22208
LDKISDSVL	31302	47970	46046	45762	43058	28028	5094
SGIGKTELAK	25547	25425	721	151	39136	39178	26691
GSPPGYVGHEEGGQLTKKLKQ	22319	40174	11871	8989	40411	18744	23659
AVVLFDEVDKAH	26308	30	2000	98	35421	37702	25712	Promiscuous
DEGRLTDGKGKTID	10895	21723	31461	30211	35764	21514	25110
AVVLFDEVD	27344	44206	45297	34438	44347	37702	29216
VTAGLAIYD	21623	37123	28160	13566	41540	43299	30564
RHSLPNSRIMIHQP	21997	1450	17465	32614	14134	3923	19129
HGSTYGGNP	24225	48651	43649	44023	46419	41182	31482
IVTMAKGIG	27564	47321	43032	38977	44519	26873	30945
VRGKGLMIGI	26980	38811	41317	42453	40313	27050	9817
PGAGKTTVGR	27225	45174	13577	4927	42302	39963	28452
VLIANRGEIA	23756	5260	35053	32331	22335	16140	16973
KKLGVQTVAVYSE	24832	154	20117	8050	35438	18197	12520
IGPAPSQQSYL	26392	39963	27869	30757	29370	2518	24245
GGGGKGMRIVR	27633	40039	25426	22012	42883	35342	24665
ERDCSVQRRHQKIIEEAPA	24505	28375	1148	136	4308	5305	1833	Promiscuous
VNYVGAGTVEFIM	16911	13937	34333	29022	15708	5995	20691
FMEMNTRLQVEHPVTE	19434	10411	28443	35908	33656	20586	15638
DLVEWQLRI	23586	1091	41715	42514	32017	38683	26180
EARIYAEDPS	28068	44643	46045	44308	44691	40458	29179
AMKMEHTIKSP	25093	18809	716	202	36893	35994	26293
ILVANRGEIA	23469	7849	34195	35671	26794	8371	19432
KKMGIKTVAIYSD	23134	230	19179	22736	15812	10705	7900
AQAVHPGYGFLSEN	24472	9966	17110	18965	23066	978	22553
SAGGGGKGMRI	27118	42737	30597	26883	42883	10750	25426
PRHIEIQVL	30327	48261	46450	45867	40382	41683	17022
ERECSIQRRNQKVVEE	22725	5013	1162	101	33450	20137	4599	Promiscuous
FYFLEMNTRLQVEHPV	21091	1622	21380	14825	1591	25003	14736
YDPMISKLI	26315	37587	46201	45510	17878	37826	23675
VIEAMKMQNSM	24727	35571	34169	24604	29690	6404	11806
KKMGIKTVAIHSD	25671	230	23335	30481	15812	10705	7900
EIGYPVMIK	27823	46357	525	399	35138	43831	27878
VMVANRGEIAIRV	21661	8517	25030	27144	19280	4593	14919
LGIRTVAIYSE	26210	28995	15688	28306	40858	29624	21048
AVHPGYGFLSE	24472	9966	17110	18965	23066	978	22553
GGGGRGMRVV	27075	36765	42001	42721	45441	33810	23242
KPRHIEVQIL	30163	46138	43790	44957	34577	71	16855
ERDCSIQRRHQ	27260	48953	34155	39959	43601	42127	26737
YFIEVNSRLQ	22839	2590	37061	37253	823	27899	12123
ERDCSVQRRHQKIIEEAPAP	26446	25841	1148	136	4308	5305	1833	Promiscuous
GAGTVEFIM	25455	20124	40247	33784	31885	29191	24076
ERDCSVQRRHQKII	24505	28375	1148	136	4308	5305	1833	Promiscuous
FMEMNTRLQVEH	19434	15825	28443	36253	32026	20586	21197
EVGYPVMIK	27733	47273	536	200	32276	43187	28219
RHLEVQILAD	20619	17741	34897	41315	33589	37799	25334
RDCSVQRRHQKIIEEAPA	24505	28375	1148	136	4308	5305	1833	Promiscuous
RDCSIQRRHQKIVEEAPA	24932	21405	552	41	7266	13783	1003	Promiscuous
DISLSDYKGK	27109	46697	1907	316	32809	43257	27062
VVVESGAGE	28310	39791	36927	29535	43506	28291	29229
KNALNTEVIKEI	24911	23012	11861	625	23069	17414	22223
KNALNTEVIKEM	24911	23012	11861	625	23069	17414	22223
EKRPPRYKG	30942	49665	46383	45406	46470	38350	27031
RPKKKNAINTEM	24628	21039	41310	42175	29830	1711	3838
LNRPKALNAL	26748	44219	41411	44797	30859	23585	13251
AFAAGADIKEM	23631	28778	7300	1083	21389	25139	24618
GGGCELAMMCDII	24089	9833	43685	41945	24414	38778	25929
GGTQRLTRAVGKS	24424	15107	14974	14821	37620	14687	12944
DAKQAGLVSKI	25417	1967	19507	1026	4779	31156	25257	Promiscuous
ALDMMLTGRSI	22583	20566	4946	1030	13192	29773	19340
GVITLNRPK	26316	44015	585	22	34744	35401	26681
LVQLPLPEHIDE	26922	6819	17215	4905	1792	20373	25960
NLITADMIK	22559	28436	2414	471	31663	43402	25342
GAAVIDVGI	25696	7568	44220	39499	29841	29841	25608
GAAVIDVGIN	25696	7568	43786	37388	29841	25657	25608
GVAPDHPEVKNV	25325	374	15548	975	26613	23406	25320
LVGRRGPLQ	26084	39568	13432	19687	35137	35759	27747
GWVKRGPTGVI	26389	21872	42624	41213	32342	6824	7076
GNVALDVARILLT	13634	314	33778	21031	12998	6964	20297
GVAPDHPEVK	25325	374	15548	975	26613	13617	25320
GVAPDHPEVKS	25325	374	15548	975	26613	13617	25320
SQSSNDTFP	24852	32131	38544	26728	38165	42158	31921
DAVPLTLGQEFSGY	8346	25659	4217	6100	6176	1572	10170
GGTAVGTGL	28288	37050	44223	43263	44524	24885	26159
EPGSSIMPGKVNP	15766	28196	16230	8472	40013	12669	26245
AALKKADVIV	24577	1742	37541	39131	19737	12767	9500
TDHMLTVEWS	29036	47657	46332	40819	37117	39601	28501
ELFEGLKAFR	29151	30482	19845	16438	30724	32141	17859
QLFEGMKAFK	26215	15313	4957	3315	23757	27625	12859
LIIVINNNG	26361	33063	42485	38974	42078	40882	29326
ILLVVNNNG	26911	22598	37717	39922	39687	41784	28775
PISAKLVANML	20697	21860	23491	28746	19630	1959	9373
VIPYFPYSKQ	26291	30912	886	28	19105	4230	27162	Promiscuous
EVVVTNTVP	27607	47532	42031	40791	42271	35278	28699
VIPYFPYSK	26291	30912	886	28	19105	37956	28276
EVVVTNTIP	27127	47287	42611	40910	42856	37585	29222
RSRRDPGKA	28647	47822	27890	39842	42230	19580	26554
AKFLNRLSD	28329	45458	45015	40850	45736	34890	28858
PQVMEFWQGQ	23389	17962	21211	3224	41849	38130	26780
DELPLPPGW	32054	49401	46365	44941	36292	43600	27567
GIIHRDLKP	27124	37942	34669	31684	43380	36392	30862
VGTAQYVSPE	21196	33487	31627	9709	40387	37267	27902
SDLWALGCIIYQLV	22828	27	34419	22762	20112	35776	19357
SDLWALGCIIYQL	22828	27	28247	22762	20112	37434	19357
ADLWSVGCILYEL	18379	212	33148	11417	16498	25221	15708
DAKADLWSIG	27314	38964	45618	42084	20892	31009	23078
KSDVWALGC	6108	32565	37656	36419	44575	42258	29896
GIIYRDLKP	26711	35662	36545	30499	42520	37748	30579
HKNGVVHRDLK	26385	44948	27027	14960	37085	32280	23106
VMHRDIKPANV	24341	4049	26560	38118	42361	34426	17289
KSDIWSLGCLLYEM	5569	246	19699	15408	6811	27423	22379
KSDIWSIGC	11039	28892	39296	36884	44155	41106	30621
KSDIWSLGCILYEL	5569	22	23322	18484	9209	25575	16161
NGIVHRDLKP	26896	40577	24318	7984	36941	36016	25450
KADVWSLGC	16962	21909	41017	38043	43621	32857	28541
HRDMKPQNILL	24415	24300	39136	43072	20745	13499	10883
YRDLKPENIML	23448	25175	43596	44458	36229	30790	12897
HRDLKPENILL	24979	21575	41387	43749	32992	27963	16628
HRDLKPDNLL	25687	43843	44567	44173	34533	32217	19989
HRDIKPENLLIS	24425	37902	41266	42668	22068	27918	19983
HRDIKPENLLL	23639	37423	41337	41898	31005	27918	18201
HRDIKPENLLLG	23639	37423	41337	41898	31005	27918	18201
HRDLKPDNLLITS	25064	22510	41057	41418	21302	8820	19989
HRDVKPSNILV	23392	32407	36867	37813	34680	6796	17693
HRDIKPENILVS	24361	28776	41200	42145	39150	23670	18049
YRDLKPENILL	23448	21575	41387	43749	32992	27963	16628
HRDLKPENVLL	23619	24202	42999	44240	34056	23125	12991
HRDVKPDNMLL	25528	41038	39377	38958	26340	14919	20219
YRDLKPENLIL	22832	28800	42636	44260	25337	35216	7920
HRDMKPQNILLA	23156	14034	39136	42790	20745	13499	10883
HRDLKPENILLN	24979	21575	41387	43718	32992	27963	16628
QKVVAIKII	28263	40816	46324	45685	34950	39307	22702
DLKPQNILLSS	24957	23698	36718	34248	31110	672	10189
YRDLKPENIMLN	23448	25175	41987	43592	36229	30790	12897
YRDLKPENIM	23448	38203	44742	44646	36328	30790	20541
KIMISDFGLS	24261	31	14459	11063	22545	22354	22560
HDKKVIHRDIKP	26341	36711	21591	16772	36559	31689	13089
IHRDIKAANVLLS	22658	38955	36001	39650	30046	6875	9220
HERRILHRDLK	25986	48739	19164	5594	34153	30996	3989
KRVIHRDIKP	25893	39300	18517	19888	40669	27927	24300
RILHRDMKP	27157	36291	14633	28601	42169	34524	28794
KKVIHRDIKP	26341	36711	21591	16772	41191	31689	25673
VVHRDLKPSNIL	25191	42004	30406	31912	36393	15438	16505
DLKPENIML	26378	25175	43596	44458	36229	34655	12897
DLKPENVLLS	25123	24202	41477	43980	34056	37894	12991
VSYLHSLGIVH	19273	11378	1294	12017	750	28032	12148
DLKPENILL	24979	21575	41387	43749	32992	37146	16628
HLHSLGIIY	1786	32769	39	6845	42420	38097	14950
DIKPENLLV	21934	31363	41133	41564	38490	37998	24710
DLKPENLLI	23565	24000	41553	43831	22619	38826	22140
DLKPENLLL	22575	23326	40121	43315	30994	37139	15296
DVKPDNMLL	26979	41038	39377	38958	26340	29508	20703
DLKPQNLLI	23700	26431	39103	43745	20456	39683	16766
LHRDMKPQNILL	24415	24300	39136	43072	20745	13499	10883
GIIHRDLKPQNILLS	24957	23698	21702	26241	31110	37156	10189
HRDLKPENLL	25468	44685	44075	43911	33327	31776	21675
IHRDLKPENILL	24979	21575	41387	43749	32992	27963	16628
GIIYRDLKPENIMLS	23448	25175	22168	20398	21482	30790	12897
IVYRDLKPENILL	24979	21575	19050	13928	23852	27963	16628
GIIYRDLKPENIML	23448	25175	22168	20398	21482	30790	12897
VVHRDLKPENVLL	26196	24202	30680	27002	34056	23125	12991
VHRDLKPENLLV	20806	17850	39792	43142	33327	31776	21675
VIHRDIKPENLLL	23639	37423	32500	33277	31005	27918	18201
IHRDIKPENLLL	23639	37423	41337	41898	31005	27918	18201
NQRMEFLGDSIM	22952	4487	37715	38059	17113	16365	20317
NERLEFLGDAVV	21067	2719	36627	38394	40474	13413	20435
EALIGAVYLE	25507	6613	26441	9119	30296	22737	21058
QRLEFLGDAIL	23462	7644	38998	39547	27950	10665	19476
IAENEMPGLM	23371	15363	42411	39809	35580	20959	26000
KPLKGARIAG	28813	46377	41625	44157	44392	212	18210
LHMTVETAVLI	16754	866	27959	19327	9316	11898	6272
LGAEVQWSSCNIFSTQDH	14977	12651	24415	2556	5190	14519	22465
GIPVYAWKGET	25541	34074	38496	29038	42728	5908	26497
NMILDDGGD	26447	43295	45395	43312	43442	43669	29300
PAINVNDSVTKSKFDN	25176	23543	14432	10538	35037	27122	21921
GYGDVGKGCAQALRG	24645	42457	32218	40195	32424	15496	1920
ITEIDPINALQA	17161	31299	34982	29922	34986	28955	22052
IILLAEGRLVNLG	24876	466	18232	35069	28161	9497	13878
GHPSFVMSNSF	22863	45972	38093	35650	10149	3295	25057
LTKLTEKQAQYLGM	5344	23225	303	10776	27786	36687	18872
DGPFKPDHYRY	29936	47849	20000	6947	22213	32715	26636
LHMTVETAVLIETL	16171	866	27959	17344	9316	11898	6272
YGDVGKGCAQALRG	24645	42457	40853	31310	40118	15496	1920
KVNIKPQVD	29944	46282	30365	32017	42141	36902	30625
AEGRLVNLG	26524	47473	45828	43598	41215	45394	26761
RWAACNIYST	22503	8053	34892	36478	17802	24506	23353
PVFAWKGES	26506	44549	38453	26365	44586	40587	28659
PAMNVNDSVTK	24241	12742	14045	6118	33324	21980	27109
GGKQVVVCGYGEVGKGC	23328	4129	20096	17005	33613	22199	26476
IVLLAEGRLLNL	22094	978	10626	29885	23696	7969	16736
GPFKPNYYRY	29788	46779	11935	2338	9983	30123	26515
EQAKYLGLN	24005	44843	37688	37860	34673	44449	27419
RWSACNIYSTQN	16441	15301	35274	11311	22704	31400	25970
ANMILDDGGD	26447	43295	45395	43312	43442	43669	29300
VVLLAEGRLLNL	22094	978	10626	29885	23705	7969	16736
DQAKYLGLN	24117	46235	41917	40287	36703	45576	28122
PAMNVNDSV	24241	12742	45308	39215	33324	21980	27665
MCGYGEVGKGC	26924	46647	16842	13472	33613	42607	27527
VLLAEGRLLNL	25257	978	10626	29885	23705	7969	16736
GVDNVDLEAAT	11830	2994	38509	25797	43280	32892	26115
GKTLGILGLGRIGR	24837	26389	1202	1793	35953	35073	25093
GETLGIIGLGRVGQ	24701	23146	1675	2091	35171	34717	26326
LVNAARGGLVDE	22357	25597	33957	28796	37892	1235	24240
TVGIIGLGR	24950	44085	3612	371	37970	41737	30166
LIMKILRDTG	26342	9124	35156	35156	40985	34155	21709
SGERLACGII	26212	45471	45725	44120	39977	29897	26367
GNAGRRLAC	28009	48184	44591	43808	45895	15230	24027
YDYGALEPHIN	26687	41136	43251	39434	145	39591	26542
QLHHSKHHA	27151	13569	21763	37815	44620	44620	27863
GHINHSIFW	29840	46833	41797	39407	22473	39086	28558
IDVWEHAYYLQYKNVR	11226	1628	16271	16395	1267	28052	20715
AYYLQYKNVR	28159	30744	32363	20520	1267	39864	25227
VGTAAVNMCLVA	13360	1188	12002	4422	19294	6884	24442
TWIIDPIDGT	26500	4712	45534	40045	24448	40490	28339
AFWKHGVQVW	26738	4861	34451	41164	3423	23746	21581
GLPHYGHIL	26519	516	36195	40076	31803	24706	25445
RWIDFDNDYKTL	15646	38095	20288	1083	11173	41919	25159
FKQLYDKGL	27794	29147	46490	45783	42836	38447	4490
ARDWTISRNRYWGTPIPLW	22557	4048	16027	27363	136	295	15603	Promiscuous
FESGSMPYAQVHYPFEN	6028	4274	5642	4855	7	16051	18165	Promiscuous
QTRGWFYTL	22012	3984	32961	22334	18081	18145	5849
DWTISRNRYWGTPIPLW	22557	4048	37081	27363	136	295	15603	Promiscuous
WFESGSMPYAQVHYPFEN	6028	4274	5642	4855	7	16051	18165	Promiscuous
HDGPPYANG	28608	48977	45482	45514	46908	43787	28525
DILDIWFDSGT	22239	9227	41084	32819	38066	40595	25125
MYVIDQYML	29721	17695	44931	40795	114	35833	21816
RYWGTPIPI	29397	4489	39819	39070	43	18710	26253
YRVLPYCWK	26097	47853	33388	24696	38693	42202	25342
TGTDEHGLKI	1741	7561	19758	2614	33155	34378	27786
HIIGKDILKFHAIYWPAFLL	13645	127	154	48	4156	7405	3839	Promiscuous
GQKMSKSLGNVVDP	19081	169	6144	24933	33182	24923	5735
HIIGKDILKFHAIY	13645	31220	154	48	10905	22829	3839	Promiscuous
KMSKSLGNVIDPL	20789	53	6144	24933	19782	19426	4764
KMSKSLGNVLDP	20789	169	6144	24933	27561	12723	1446
KGEKMSKSLGNVI	20789	169	6144	24933	19782	11685	4764
TNVPGVFAAGD	27100	27995	42475	37386	40449	25921	24848
DVKVVILGQDPY	20551	45630	17865	848	40447	33322	28008
RLRKEGGQY	15841	48004	217	24605	44303	16633	20511
HLQSSLQELE	20893	152	26490	34152	29362	19645	8087
VVLGHSERR	26291	41487	2458	259	33908	38838	27975
Total 359	SB-2, WB 5	SB-27, WB 43	SB-10, WB 35	SB-30, WB 29	SB-10, WB 15	SB-8, WB 30	SB-0, WB 22	Promiscuous 26
								Total promiscuous - 44
